# Supplementary material
Source: publisher site journal article supplement (https://www.dovepress.com/article/488900)
Supplement: Supplementary file 1 [file get_supplementary_file.php]

**Supplementary Table 1** Correlation analysis among variables

| Variable | SII | NLR | PLR | MLR | platelets | leukocytes |
| --- | --- | --- | --- | --- | --- | --- |
| SII | 1.000 |  |  |  |  |  |
| NLR | 0.729** | 1.000 |  |  |  |  |
| PLR | 0.847** | 0.580** | 1.000 |  |  |  |
| MLR | 0.362** | 0.426** | 0.279** | 1.000 |  |  |
| platelets | 0.412** | -0.239** | 0.404** | -0.083 | 1.000 |  |
| leukocytes | 0.373** | 0.330** | -0.118 | 0.217** | 0.138* | 1.000 |

**Notes:** **: p-values are all <0.01; *: p-values are all <0.05.

**Abbreviations:** SII, Systemic immune-inflammation index; NLR, Neutrophil-to-lymphocyte ratio; PLR, Platelet-to-lymphocyte ratio; MLR, Monocyte-to-lymphocyte ratio.
